# Supplementary material
Source: PubMed Central journal article supplement (PMC2675749)
Supplement: pp.109.135335_1.pdf [file pp.109.135335_1.pdf]

|                           |                                                                                        |       |
|---------------------------|----------------------------------------------------------------------------------------|-------|
| Vf Inh3 (AB372570)        | MDRRRGTRQVLSPPSATGTTITIESSV-----PSSSSSQEQQP---EVLFLPLNRK-KKKVSWKGTVDNEF                | [ 68] |
| Mt Inh3 (ABN09808)        | MDRRRNSTRPVALSPPSITATTTI IQNSD-----ASSSSSQHEQQP---EVLFLPLNRK-KKKVSWKGTVDNEF            | [ 68] |
| At Inh3 (At2g31305)       | MS---TATR-----PSSSATTSVILENPV-----SQS-----OPT---ERLVLRLNRK-KKKVSWKGTVDNEF              | [ 52] |
| Os Inh3a (NP_001052397)   | -----MATR-----APATGSATVTVDPST-----SSS--APASSAPPPAAETVVLRLKRRRAKKVTVKGTVDNES            | [ 59] |
| Os Inh3b (NP_001055058)   | -----MATR-----APATGSATVTVDPSP-----SSSSAPASSAPPPAAESVVLRLKRRRAKKVTVKGTVDNES             | [ 61] |
| P.falci parum (Q8I1J88)   | -----MCPMHSSTTTTTTYVQ-----DTNTQN---DTNENSSIVRILKLAQKVVWRVDENTIDNEN                     | [ 54] |
| N.crassa (EAA27640)       | -----MTSVAQRQAQPAQPS-----SQTAAPTRTQTETSSPAILRLRGAHSHNGSRVQWRSDVDVNEG                   | [ 58] |
| S.cerevisiae (BAA09242)   | -----MSGNOMAMGSEQQTVGSR-----VSVEEVPVQLRATQDPPRSQEAEMPTHNRVWENVDNEN                     | [ 62] |
| S.pombe (O14218)          | -----MELTRPLGDISSSAT-----VTIESTEESASTSHEEENVLHLQPEPVRVWTVSTVDNEF                       | [ 57] |
| C.elegans (NP_498652)     | -----MSHTQQQTASSTETS-----TVTVPSPREQLVHLSPNPAQPSSTERRHVWATETVDNEG                       | [ 57] |
| C.elegans (NP_497013)     | -----MAQSNITTT-----TTLVVKSEDEEVEEHLRLRAPPSPPHVWAGVVDNEH                                | [ 49] |
| C.elegans (NP_496183)     | -----MQAPVVT-----ETCQTNEEG---EQLVLRAPVERPRVWAGVVDNEH                                   | [ 43] |
| D.melanogaster (AAF50877) | -----MDSNCDLSMVGQTEPKPKWASSSTQITSRASETFSGVGSIASTETSLQPVAAPTMYLRLAQQRPIRTHRVHFHAGVVDNEH | [ 84] |
| D.melanogaster (AAF52335) | -----MAHKQSTNNETSNGSTTEIID-----ETDARAQLESGRTPPTLLRLEHPRNRERAFHAGVVDNEH                 | [ 62] |
| D.erio (CAM56331)         | -----MAEVPGTSSET-ITET-----VQTGTP--PPQQEGRSLTIKLRKRKTEKKVWESDVTVDNEH                    | [ 55] |
| X.laevis (Q6DDH0)         | -----MAETSGPTAAGGSTSS-----TVTTES--ETQPEHRSLLKLRKRKPKKVEWTCDTVDNEN                      | [ 55] |
| M.musculus (Q8K1L5)       | -----MAETGAGISSET-VTET-----TVTETTIVTETTEPENQSLTKMLRKRKPEKKVWESDVTVDNEH                 | [ 57] |
| H.sapiens (CAC16920)      | -----MAEAGAGLSET-VTET-----TVTVT-----TEPENRSLTIKLRKRKPEKKVWESDVTVDNEH                   | [ 52] |
|                           |                                                                                        |       |
| Vf Inh3 (AB372570)        | MQKKS SKKCCIFHKEKPFDEDD-----SDE-DDVAHGS DKHP-----HDLGD-----NGFCCK                      | [115] |
| Mt Inh3 (ABN09808)        | MQKKS SKKCCIFHKEKPFDEDD-----SDE-DDIPHHS DHHP-----HDHGD-----GGFCCK                      | [115] |
| At Inh3 (At2g31305)       | MQKKS SKKCCIFHKKQKPFDEDD-----SEEEEDNNHCHDN-----HEHSE-----SGEASS                        | [ 99] |
| Os Inh3a (NP_001052397)   | LGRKSSKCCIFHKKVDPFDEDD-----SDDDPDGG--RRSPP-----GDAGEGTSGGGGCCS                         | [110] |
| Os Inh3b (NP_001055058)   | LGRKSSKCCIFHKEVDPFDEDD-----SDDEPDGGGRRSPP-----GDAGEGTSGGGG--CCS                        | [113] |
| P.falci parum (Q8I1J88)   | AQKKS SKVCCIIYHKPKNFGEESD-----SES DLS DVELPDTQ-----RMKN-----                           | [ 96] |
| N.crassa (EAA27640)       | LGRKSKVCCIIYHRPKGVDESDDSSSSSSSDSDSDSDPEPDKRITSGGGSSGRGHRHSHDHHDGREGGNCNDHGRGRKHNKNGK   | [148] |
| S.cerevisiae (BAA09242)   | MNKKKTKIICCIFHPQNEDEEFCN-----HHSODDGS SSSSSSS-----ESENKLDLFNERRQR                      | [117] |
| S.pombe (O14218)          | MNKKKSKVCCIFHKQRKDFESS-----SDSDSDSDSDSSSS-----CCSRN-----                               | [ 99] |
| C.elegans (NP_498652)     | MGKKS SKCCIIYKPKNQDSS-----SDSDSD-----CETGHCRC--HYEHKK                                  | [ 99] |
| C.elegans (NP_497013)     | MGR LKSNCCIIYAPRQWDDPSTWEP-----NEYETEHCRCGHTLPER-----KKKKEDGDGEGDDENK                  | [107] |
| C.elegans (NP_496183)     | MGR LKSNCCIIYPPRVWDDPSTWEP-----EEHETEHCRCGHTLPE-----KKQKQGG--HGSDKD-                   | [ 98] |
| D.melanogaster (AAF50877) | MNRKSKCCIIYKPHPFGESSS-----TDDECEHCFGHPEVRT-----RNRLKQRIOEQQNGC                         | [140] |
| D.melanogaster (AAF52335) | LNRRKSKCCIIYKPLAFGESSSE-----DDECEHCFGHPEKRRQ-----RN--AKHNHNDGKPC                       | [116] |
| D.erio (CAM56331)         | LGRSSKCCIIYKPRQFGESS-----SESEGDEEGCGSAH-----CILGHGRRRHGQREGG                           | [108] |
| X.laevis (Q6DDH0)         | LGRSSKCCIIYKPRPFGESS-----SESE-DDDDCCESAH-----CIRGHKATSGSKETP                           | [107] |
| M.musculus (Q8K1L5)       | MGRSSKCCIIYKPRAFGESS-----TESDEEEEGCSHKH-----CVRGRHKGRRPTTPAP                           | [110] |
| H.sapiens (CAC16920)      | MGRSSKCCIIYKPRAFGESS-----TESDEEEEGCGHTH-----CVRGRHKGRRRATLGP                           | [105] |
|                           |                                                                                        |       |
| Vf Inh3 (AB372570)        | NHDEAGPSS-----                                                                         | [124] |
| Mt Inh3 (ABN09808)        | NHDEAGPSS-----                                                                         | [124] |
| At Inh3 (At2g31305)       | SNDSKAVD-----                                                                          | [107] |
| Os Inh3a (NP_001052397)   | SSSDGHH-----                                                                           | [118] |
| Os Inh3b (NP_001055058)   | SSSHGHGHGDH-----                                                                       | [125] |
| P.falci parum (Q8I1J88)   | -----                                                                                  | [ 96] |
| N.crassa (EAA27640)       | KTERRRSPNAYEKMPYKPKDGGAGPSNSETQGPGGSK-----                                             | [186] |
| S.cerevisiae (BAA09242)   | RLERRHRKLEKRSYSPNAYEIQPDYSEYRRKQEQEKD-----                                             | [155] |
| S.pombe (O14218)          | AYERA-----                                                                             | [104] |
| C.elegans (NP_498652)     | NEEPKSSN-----                                                                          | [107] |
| C.elegans (NP_497013)     | ENKDNKDN-----KDNKDNNGCGCDHC-----                                                       | [132] |
| C.elegans (NP_496183)     | EDKGN-----CGCDHC-----                                                                  | [109] |
| D.melanogaster (AAF50877) | SCCHHHRLHSMNRNRPTEETIAQHKDDLAKPEPKSVVNNSSLLKLNENVKSSKPEKKNNSNRLPEFSQAKSRRKPA           | [221] |
| D.melanogaster (AAF52335) | TEASHPE-----GPSTSTQAAHISQPPAEPVESKTDPKPPTPGVDFEQTGSS-----                              | [163] |
| D.erio (CAM56331)         | GTTVPP-----SSGGTNP-----                                                                | [122] |
| X.laevis (Q6DDH0)         | SSHHDK-----TGSMDQ-----                                                                 | [119] |
| M.musculus (Q8K1L5)       | TPTTTPQPPDPSPPPPQMQH-----                                                              | [131] |
| H.sapiens (CAC16920)      | TPTTTPQPPDPSPPPPQMQH-----                                                              | [126] |

**Supplemental Figure S1. Multiple Alignments of the Inh3 Protein Sequences by CLUSTAL W.**

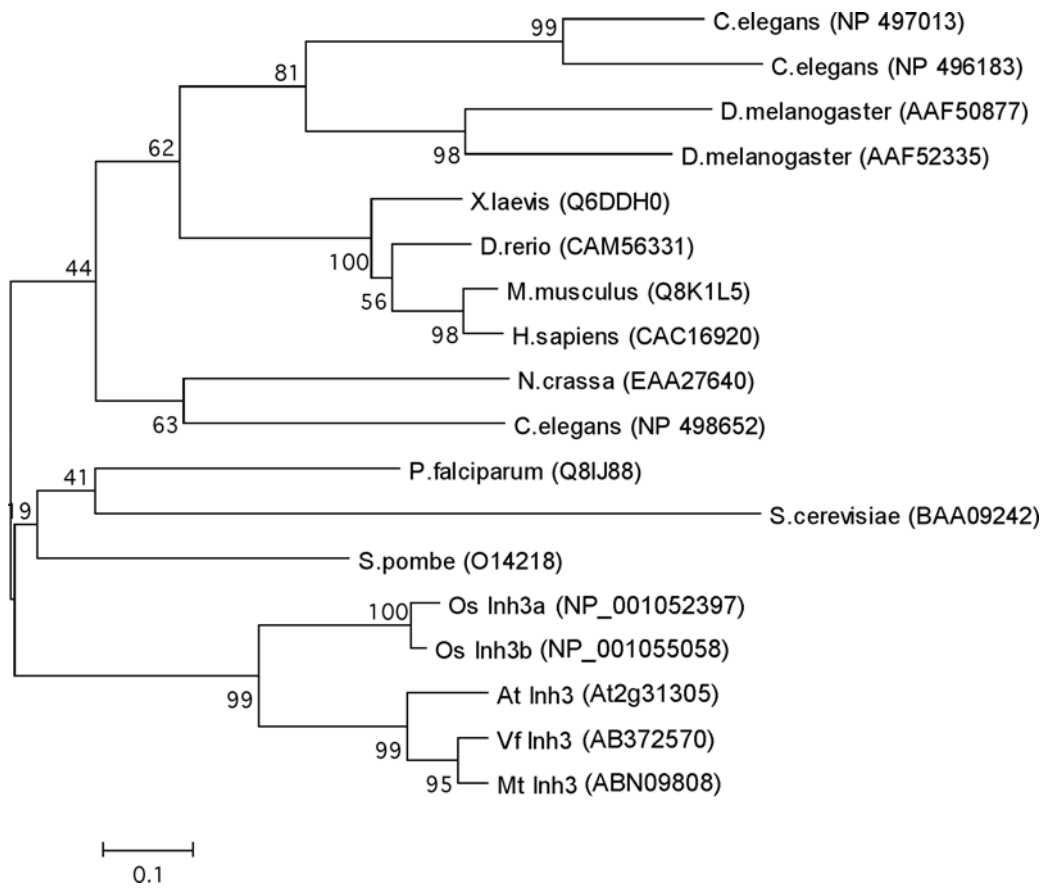

**Supplemental Figure S2.** Neighbor-Joining Phylogenetic Tree of Inh3 Protein Sequences with Bootstrap Values (1000 replicates).

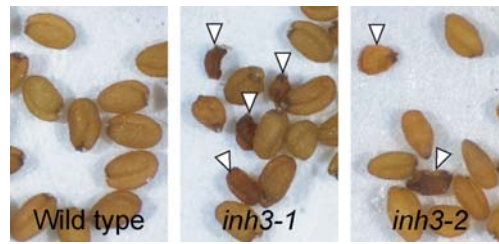

**Supplemental Figure S3.** Dry Mature Seeds from Siliques of Wild-type and Heterozygous *inh3* Mutants.

Arrowheads indicate shriveled and dark brown seeds.

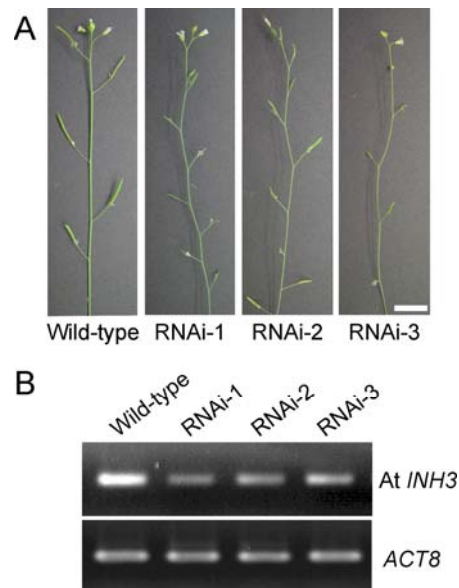

**Supplemental Figure 4.** Seed Development Defect by RNAi-mediated Suppression of *At INH3* Expression

**(A)** Phenotypes of inflorescence in wild-type and *At INH3*-RNAi T2 lines (RNAi-1, RNA-2, and RNAi-3). The bar represents 1 cm.

**(B)** Expression of *At INH3* transcripts in wild-type and three *At INH3*-RNAi T2 lines determined by RT-PCR. Total RNA was extracted from immature siliques of both wild-type and RNAi lines. *ACT8* was used as an internal control.

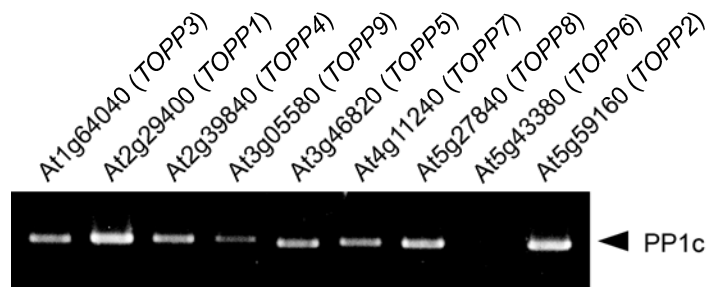

**Supplemental Figure S5.** RT-PCR Analysis of the Expression of the Arabidopsis PP1c Isoforms in Young Green Siliques.
